# Supplementary material for: Improved efficiency of blue polymer light-emitting diodes using a hole transport material
Source: Royal Society of Chemistry journal article supplement (doi:10.1039/c7tc01705g), 2017-01-01
Supplement: c7tc01705g1.pdf [file c7tc01705g1.pdf]

## Supporting Information

# Improved Efficiency of Blue Polymer Light-Emitting Diodes Utilizing A Hole Transport Material

Junfei Liang,<sup>a</sup> Lei Ying,<sup>\*,a</sup> Wei Yang,<sup>a</sup> Junbiao Peng,<sup>\*,a</sup> and Yong Cao<sup>a</sup>

<sup>†</sup> Institute of Polymer Optoelectronic Materials and Devices, State Key Laboratory of Luminescent Materials and Devices, South China University of Technology, Guangzhou, 510640, China

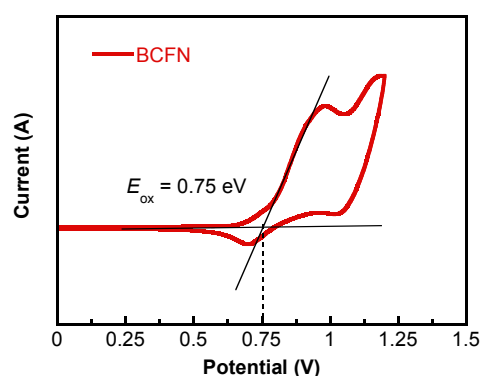

**Figure S1.** The CV characteristics of BCFN. The observed onset of the oxidation potential ( $E_{OX}$ ) is 0.75 V, and the redox of ferrocene/ferrocenium is estimated as 0.25 V under exactly the same condition. According to the equation of  $HOMO = -e(E_{OX} + 4.80 - 0.25)$  eV, the HOMO is calculated to be  $-5.30$  eV. The lowest unoccupied molecular orbital (LUMO) energy level of BCFN is estimated by adding the optical bandgap ( $E_g^{opt} = 3.06$  eV, estimated from the onset of the absorption of BCFN, as shown in Figure 2a) to the HOMO, which is determined to be  $-2.24$  eV.

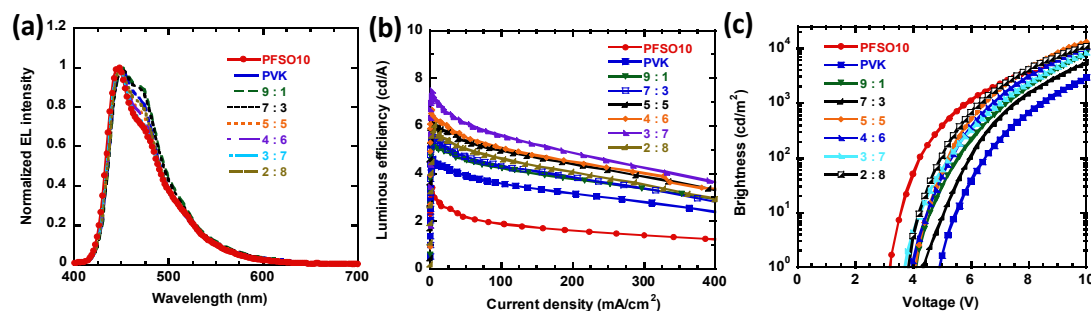

**Figure S2.** The electroluminescent spectra (a), luminous efficiency–current density (b) and luminance–voltage (c) characteristics of devices.

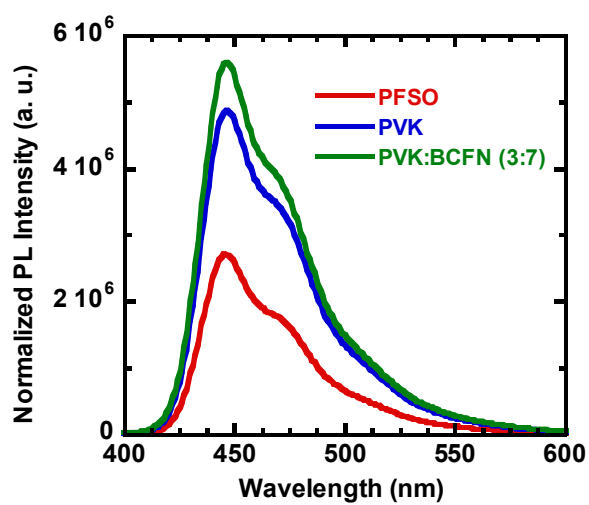

**Figure S3.** The PL spectra of PFSO (80 nm) films processed on quartz/PEDOT:PSS with or without 20 nm PVK or PVK:BCFN = 3:7 as hole transport layer.

**Table S1.** The hole mobility of the HTL computed with the field dependent space-charge limited current (SCLC) model.

| HTL            | Hole mobility <sup>a</sup> |
|----------------|----------------------------|
| PVK            | $2.09 \times 10^{-9}$      |
| PVK:BCFN = 9:1 | $1.03 \times 10^{-8}$      |
| PVK:BCFN = 7:3 | $9.86 \times 10^{-7}$      |
| PVK:BCFN = 5:5 | $1.15 \times 10^{-5}$      |
| PVK:BCFN = 4:6 | $2.14 \times 10^{-5}$      |
| PVK:BCFN = 3:7 | $2.89 \times 10^{-5}$      |
| PVK:BCFN = 2:8 | $3.32 \times 10^{-5}$      |
| BCFN           | $5.43 \times 10^{-5}$      |

<sup>a</sup> The hole mobility is calculated in the electric field of  $5 \times 10^5 \text{ V cm}^{-1}$ .
